# Supplementary material for: Media from macrophages co-incubated with Enterococcus faecalis induces epithelial cell monolayer reassembly and altered cell morphology
Source: PubMed Central journal article supplement (PMC5549984; doi:10.1371/journal.pone.0182825), 2017-08-09
Supplement: pone.0182825.s002.pdf [file pone.0182825.s002.pdf]

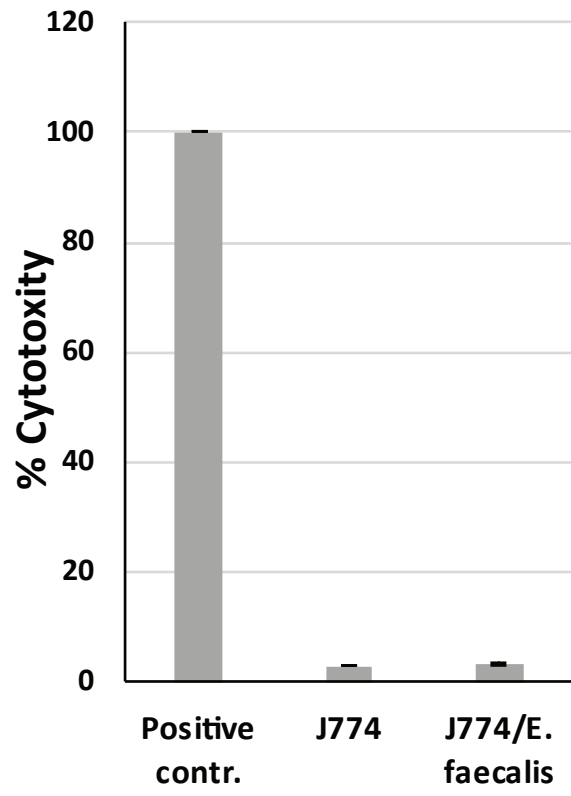

**S2 Fig.**
