# Supplementary material for: Media from macrophages co-incubated with Enterococcus faecalis induces epithelial cell monolayer reassembly and altered cell morphology
Source: PubMed Central journal article supplement (PMC5549984; doi:10.1371/journal.pone.0182825), 2017-08-09
Supplement: pone.0182825.s006.pdf [file pone.0182825.s006.pdf]

**A**

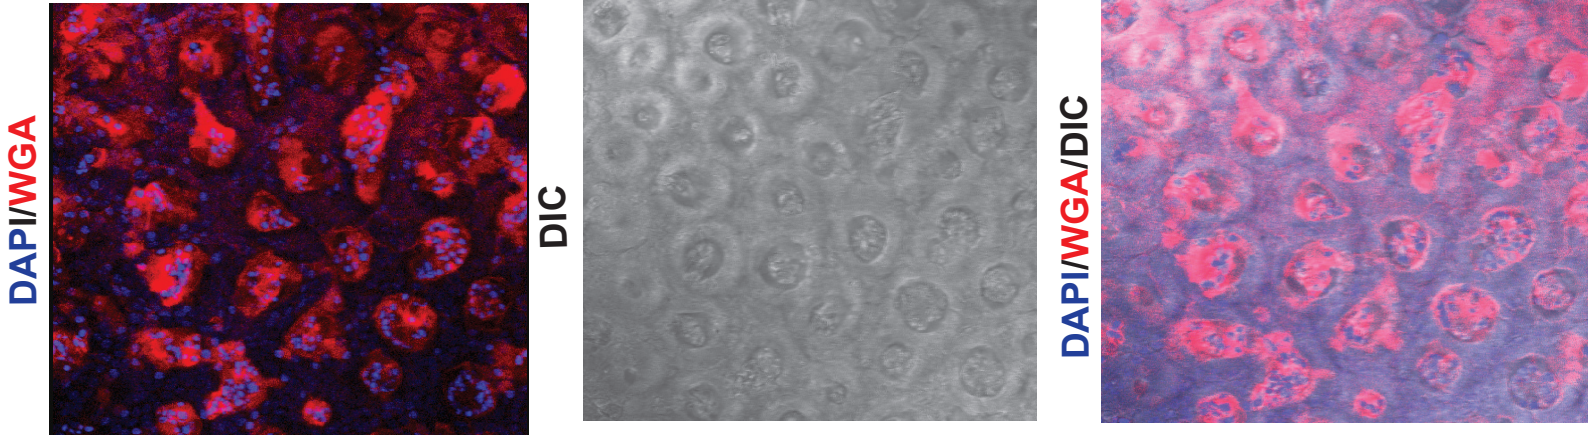

**B**

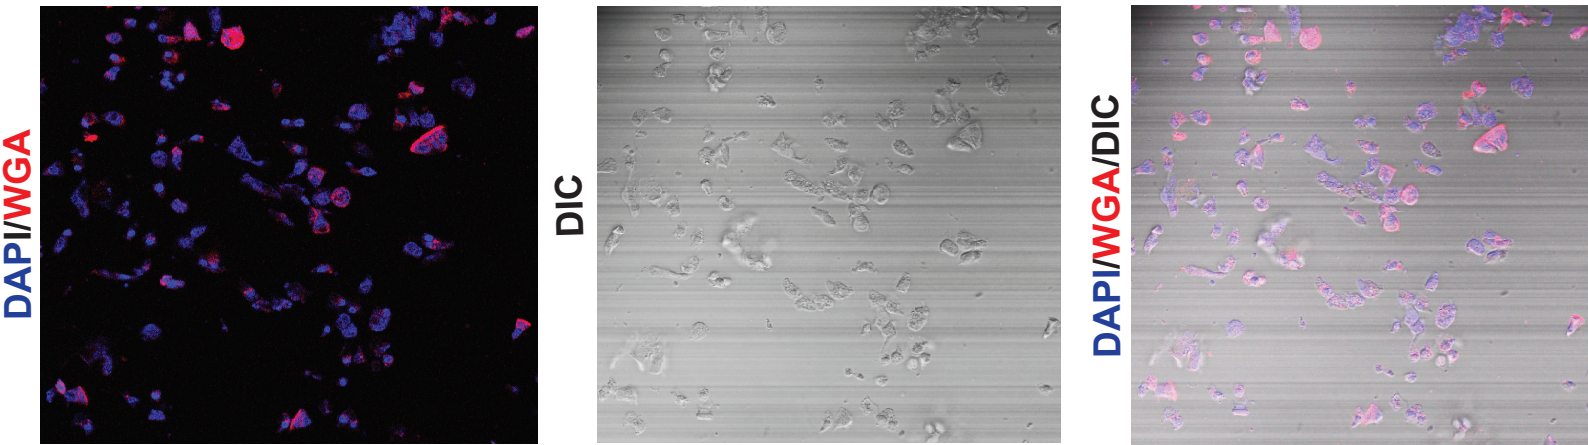

**S6 Fig.**
